# Supplementary material
Source: PubMed Central journal article supplement (PMC7604731)
Supplement: supp_D120000726_159220_2_supp_564229_qdf44t.pdf [file supp_D120000726_159220_2_supp_564229_qdf44t.pdf]

## Supplemental tables and figures

| Compound                                                                                                                                        | Company                           | Cat # (Lot #)                 | Other          |
|-------------------------------------------------------------------------------------------------------------------------------------------------|-----------------------------------|-------------------------------|----------------|
| Cholic acid<br>(CA; 3 $\alpha$ ,7 $\alpha$ ,12 $\alpha$ -trihydroxy-5 $\beta$ -cholan-24-oic acid)                                              | Sigma-Aldrich                     | C-1129 (50K0240)              |                |
| Taurocholic acid<br>(TCA; N-(3 $\alpha$ ,7 $\alpha$ ,12 $\alpha$ -trihydroxy-5 $\beta$ -cholan-24-oyl)-<br>taurine)                             | Sigma-Aldrich                     | T4009-50<br>(S43S3752)        | Sodium<br>salt |
| Glycocholic acid<br>(GCA; N-(3 $\alpha$ ,7 $\alpha$ ,12 $\alpha$ -trihydroxy-5 $\beta$ -cholan-24-oyl)-<br>glycine)                             | Sigma-Aldrich                     | G-7132 (29H5236)              | Sodium<br>salt |
| Chenodeoxycholic acid<br>(CDCA; 3 $\alpha$ ,7 $\alpha$ -dihydroxy-5 $\beta$ -cholan-24-oic acid)                                                | Sigma-Aldrich                     | C-9377 (124H0148)             |                |
| Taurochenodeoxycholic acid<br>(TCDCa; N-(3 $\alpha$ ,7 $\alpha$ -dihydroxy-5 $\beta$ -cholan-24-oyl)-<br>taurine)                               | Toronto Research<br>Chemicals     | T008130                       |                |
| Glycochenodeoxycholic acid<br>(GCDCA; N-(3 $\alpha$ ,7 $\alpha$ -dihydroxy-5 $\beta$ -cholan-24-oyl)-<br>glycine)                               | Biosynth                          | G-5220<br>(0000011611)        |                |
| Lithocholic acid<br>(LCA; 3 $\alpha$ -hydroxy-5 $\beta$ -cholan-24-oic acid)                                                                    | Sigma-Aldrich                     | L-6250 (100K2501)             |                |
| Tauroolithocholic acid<br>(TLCA; N-(3 $\alpha$ -hydroxy-5 $\beta$ -cholan-24-oyl)-<br>taurine)                                                  | Sigma-Aldrich                     | T-7515 (096H5019)             | Sodium<br>salt |
| Glycolithocholic acid<br>(GLCA; N-[(3 $\alpha$ ,5 $\beta$ )-3-hydroxy-24-oxocholan-24-yl]-<br>glycine)                                          | Isosciences                       | 13231UNL (SJ4-<br>2014-276A1) |                |
| Deoxycholic acid<br>(DCA; 3 $\alpha$ ,12 $\alpha$ -dihydroxy-5 $\beta$ -cholan-24-oic acid)                                                     | Sigma-Aldrich                     | D-6750 (30K0197)              |                |
| Taurodeoxycholic acid<br>(TDCA; N-(3 $\alpha$ ,12 $\alpha$ -dihydroxy-5 $\beta$ -cholan-24-oyl)-<br>taurine)                                    | Sigma-Aldrich                     | T-0875 (126H5022)             |                |
| Glycodeoxycholic acid<br>(GDCA; N-(3 $\alpha$ ,12 $\alpha$ -dihydroxy-5 $\beta$ -cholan-24-<br>oyl)glycine)                                     | Sigma-Aldrich                     | G-9910-1G<br>(10K1024)        |                |
| Ursodeoxycholic acid<br>(UDCA; 3 $\alpha$ ,7 $\beta$ -dihydroxy-5 $\beta$ -cholan-24-oic acid)                                                  | Sigma-Aldrich                     | U-5127 (129H1583)             |                |
| Glycoursodeoxycholic acid<br>(GUDCA; N-(3 $\alpha$ ,7 $\beta$ -dihydroxy-5 $\beta$ -cholan-24-oyl)-<br>glycine)                                 | Calbiochem                        | 362549<br>(D00032972)         | Sodium<br>salt |
| Allocholic acid<br>(ACA; 3 $\alpha$ ,7 $\alpha$ ,12 $\alpha$ -trihydroxy-5 $\alpha$ -cholan-24-oic acid)                                        | Toronto Research<br>Chemicals     | A545000                       |                |
| Isoallolithocholic acid<br>(IALCA; 3 $\beta$ -hydroxy-5 $\alpha$ -cholan-24-oic acid)                                                           | Steraloids                        | C0700-000 (B1465)             |                |
| 3-oxo-chol-4-enic acid                                                                                                                          | Steraloids                        | C2270-000 (B1338)             |                |
| 3-oxo-cholic acid<br>(3-oxo-CA; 3-oxo-7 $\alpha$ ,12 $\alpha$ -dihydroxy-5 $\alpha$ -cholan-24-oic<br>acid)                                     | Dr. James E. Polli's lab<br>(UMB) | N/A                           |                |
| 7 $\alpha$ -hydroxy-3-oxo-chol-4-en-24-oic acid                                                                                                 | Toronto Research<br>Chemicals     | H951180 (1014-<br>JQW-137)    |                |
| Cholic acid-d <sub>4</sub><br>(CA-d <sub>4</sub> ; 5 $\beta$ -cholanic acid-3 $\alpha$ ,7 $\alpha$ ,12 $\alpha$ -triol-2,2,4,4-d <sub>4</sub> ) | Cambridge Isotope<br>Laboratories | DLM-2611-0                    |                |
| Glycochenodeoxycholic acid-d <sub>4</sub>                                                                                                       | Cambridge Isotope<br>Laboratories | DLM-7804-0.01                 |                |

(GCDCA-d<sub>4</sub>; 5β-cholanic acid-3α,7α-diol N-  
[carboxymethyl]-amide-2,2,4,4-d<sub>4</sub>)

---

**Table S1. Sources of authentic standards for analytes and stable isotope-labeled internal standards.**

| Internal Standard    | Recovery       | Intra-day precision (4 hr) | Intra-day accuracy (4 hr) | Inter-day precision (24 hr) | Inter-day accuracy (24 hr) | Benchmark stability (4 hr) |
|----------------------|----------------|----------------------------|---------------------------|-----------------------------|----------------------------|----------------------------|
| <b>Plasma</b>        |                |                            |                           |                             |                            |                            |
| CA-d <sub>4</sub>    | 45.5 (±13.2)%  | 8.2 (±10.8)%               | 95.6 (±11.9)%             | 8.1 (±10.8)%                | 88.2 (±19.7)%              | 11.2 (±9.0)%               |
| GCDCA-d <sub>4</sub> | 114.9 (±28.6)% | 14.6 (±4.7)%               | 117.7 (±5.6)%             | 14.5 (±4.2)%                | 108.4 (±20.9)%             | 3.9 (±5.4)%                |
| <b>Bile</b>          |                |                            |                           |                             |                            |                            |
| CA-d <sub>4</sub>    | 100.0 (±28.9)% | 12.7 (±5.0)%               | 119.5 (±26.8)%            | 12.4 (±1.7)%                | 113.3 (±2.0)%              | 10.5 (±8.4)%               |
| GCDCA-d <sub>4</sub> | 100.0 (±25.7)% | 7.3 (±4.1)%                | 98.9 (±8.8)%              | 5.7 (±8.1)%                 | 95.4 (±9.7)%               | 11.3 (±8.9)%               |
| <b>Liver</b>         |                |                            |                           |                             |                            |                            |
| CA-d <sub>4</sub>    | 73.1 (±4.2)%   | 8.0 (±5.6)%                | 80.4 (±25.8)%             | 9.8 (±5.8)%                 | 108.4 (±9.9)%              | 13.2 (±0.2)%               |
| GCDCA-d <sub>4</sub> | 73.3 (±4.5)%   | 2.4 (±2.6)%                | 91.3 (±26.9)%             | 2.6 (±1.1)%                 | 100.2 (±3.6)%              | 2.8 (±1.1)%                |
| <b>Cell lysate</b>   |                |                            |                           |                             |                            |                            |
| CA-d <sub>4</sub>    | 74.1 (±2.2)%   | 13.6 (±3.3)%               | 109.1 (±17.7)%            | 13.3 (±10.6)%               | 89.7 (±17.0)%              | 13.6 (±4.1)%               |
| GCDCA-d <sub>4</sub> | 66.0 (±8.4)%   | 7.8 (±7.3)%                | 97.1 (±10.3)%             | 12.6 (±13.5)%               | 90.0 (±13.3)%              | 8.0 (±7.4)%                |
| <b>Cell medium</b>   |                |                            |                           |                             |                            |                            |
| CA-d <sub>4</sub>    | 98.8 (±8.4)%   | 14.1 (±6.7)%               | 86.0 (±5.8)%              | 7.0 (±8.6)%                 | 93.4 (±8.0)%               | 8.5 (±11.8)%               |
| GCDCA-d <sub>4</sub> | 85.5 (±4.7)%   | 8.0 (±8.7)%                | 120.0 (±24.5)%            | 13.6 (±11.8)%               | 109.8 (±21.0)%             | 8.5 (±9.3)%                |

**Table S2. Method validation – Apparent recovery, stability, precision, and accuracy.** Values are presented as mean ± standard deviation;  $n \geq 5$  for all validation experiments. Apparent recovery was obtained from the ratio of response from samples spiked with IS pre-extraction to responses from samples spiked with IS post-extraction for each matrix. Accuracy was determined by comparing calculated value with spike value of IS using calibrants run that day or 24 hours before. Intra-day studies were performed using 4 hour intervals for each matrix. Inter-day studies were performed using 24 hour intervals for each matrix. Benchmark stability was evaluated by leaving specified matrix with spiked IS at ambient room temperature ( $23 \pm 2^\circ\text{C}$ ) for 4 hours before performing extraction. COS-1 cells grown with DMEM were used for cell lysate and cell medium method validation.

| Analyte                                                           | <i>m/z</i> transition | <i>t<sub>R</sub></i> (min) | CE (eV) |
|-------------------------------------------------------------------|-----------------------|----------------------------|---------|
| Lithocholic acid (LCA)                                            | 375.3 > 375.3         | 21.99                      | 18      |
| Chenodeoxycholic acid (CDCA)                                      | 391.3 > 391.3         | 17.22                      | 18      |
| Deoxycholic acid (DCA)                                            | 391.3 > 391.3         | 17.76                      | 18      |
| Ursodeoxycholic acid (UDCA)                                       | 391.3 > 391.3         | 13.06                      | 18      |
| Cholic acid (CA)                                                  | 407.3 > 407.3         | 12.72                      | 18      |
| Allocholic acid (ACA)                                             | 407.3 > 407.3         | 12.42                      | 18      |
| Glycolithodeoxycholic acid (GLCA)                                 | 432.3 > 74.1          | 18.35                      | 35      |
| Glycodeoxycholic acid (GDCA)                                      | 448.3 > 74.1          | 14.29                      | 35      |
| Glycoursodeoxycholic acid (GUDCA)                                 | 448.3 > 73.9          | 8.69                       | 35      |
| Glycochenodeoxycholic acid (GCDCA)                                | 448.3 > 73.8          | 13.48                      | 35      |
| Glycocholic acid (GCA)                                            | 464.3 > 73.9          | 9.00                       | 35      |
| Taurolithocholic acid (TLCA)                                      | 482.3 > 80.0          | 17.55                      | 50      |
| Taurodeoxycholic acid (TDCA)                                      | 498.3 > 123.8         | 13.05                      | 40      |
| Taurochenodeoxycholic acid (TCDCA)                                | 498.3 > 80.0          | 11.91                      | 50      |
| Taurocholic acid (TCA)                                            | 514.3 > 123.9         | 7.89                       | 40      |
| Isoallolithocholic acid (IALCA)                                   | 375.3 > 375.3         | 19.82                      | 10      |
| 3-oxo-chol-4-enic acid                                            | 371.0 > 123.0         | 19.82                      | 30      |
| 3-oxo-CA                                                          | 405.0 > 289.0         | 11.88                      | 30      |
| 7 $\alpha$ -hydroxy-3-oxo-chol-4-en-24-oic acid                   | 387.0 > 263.0         | 13.79                      | 28      |
| <b>Internal standard</b>                                          |                       |                            |         |
| Cholic acid-d <sub>4</sub> (CA-d <sub>4</sub> )                   | 411.3 > 347.3         | 12.72                      | 35      |
| Glycochenodeoxycholic acid-d <sub>4</sub> (GCDCA-d <sub>4</sub> ) | 452.3 > 73.8          | 13.48                      | 35      |

**Table S3. Summary of *m/z* transitions, retention times, and collision energies used for analyte detection.**

**HepG2 Cells in HCM**

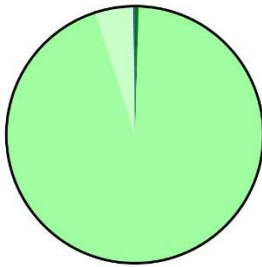

- 0.12% LCA
- 0.36% CDCA
- 94.51% CA
- 4.83% ACA
- 0.15% GDCA
- 0.04% GCDCA

**HepG2 Media (HCM)**

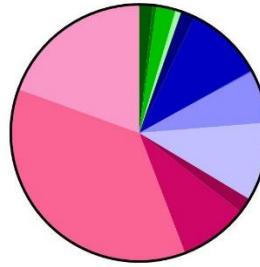

- 1.68% LCA
- 0.48% CDCA
- 2.42% UDCA
- 0.73% CA
- 1.74% GLCA
- 9.88% GDCA
- 0.16% GUDCA
- 6.63% GCDCA
- 9.89% GCA
- 1.91% TLCA
- 8.67% TDCA
- 36.34% TCDCA
- 19.46% TCA

**HepG2 Cells Grown in DMEM**

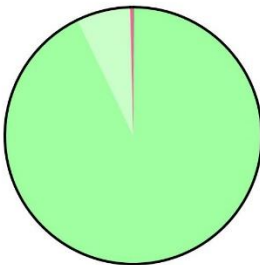

- 0.07% LCA
- 92.76% CA
- 6.75% ACA
- 0.02% GCDCA
- 0.02% GCA
- 0.38% TCDCA

**HepG2 Media (DMEM)**

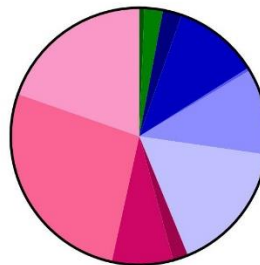

- 0.65% LCA
- 2.33% CDCA
- 2.37% GLCA
- 10.73% GDCA
- 0.35% GUDCA
- 10.85% GCDCA
- 16.55% GCA
- 1.90% TLCA
- 7.71% TDCA
- 26.90% TCDCA
- 19.66% TCA

**HuH-7 Cells Grown in HCM**

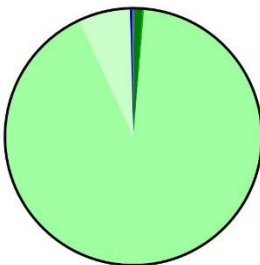

- 0.13% LCA
- 1.03% CDCA
- 0.18% UDCA
- 91.65% CA
- 6.56% ACA
- 0.35% GDCA
- 0.07% GCDCA
- 0.02% GCA

**HuH-7 Media (HCM)**

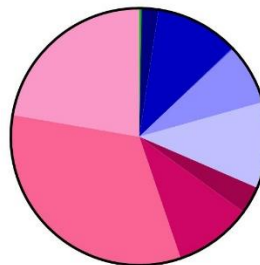

- 0.28% UDCA
- 2.14% GLCA
- 10.49% GDCA
- 0.14% GUDCA
- 7.60% GCDCA
- 10.86% GCA
- 3.44% TLCA
- 9.82% TDCA
- 32.94% TCDCA
- 22.29% TCA

**HuH-7 Cells Grown in DMEM**

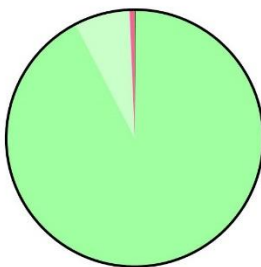

- 0.13% LCA
- 0.01% CDCA
- 92.21% CA
- 6.96% ACA
- 0.02% GCDCA
- 0.04% GCA
- 0.63% TCDCA

**HuH-7 Media (DMEM)**

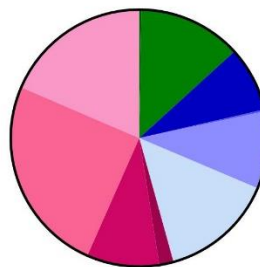

- 0.27% LCA
- 12.98% CDCA
- 8.17% GDCA
- 0.24% GUDCA
- 9.72% GCDCA
- 14.33% GCA
- 1.80% TLCA
- 9.12% TDCA
- 24.84% TCDCA
- 18.53% TCA

**Figure S1. BA pool in immortalized cells and media**, presented as average (n=3) percent of TBA. Unconjugated BAs are represented in shades of green, G-amidated BAs in shades of blue, and T-amidated BAs in shades of red. Constructed from data in Tables 2 and 3.

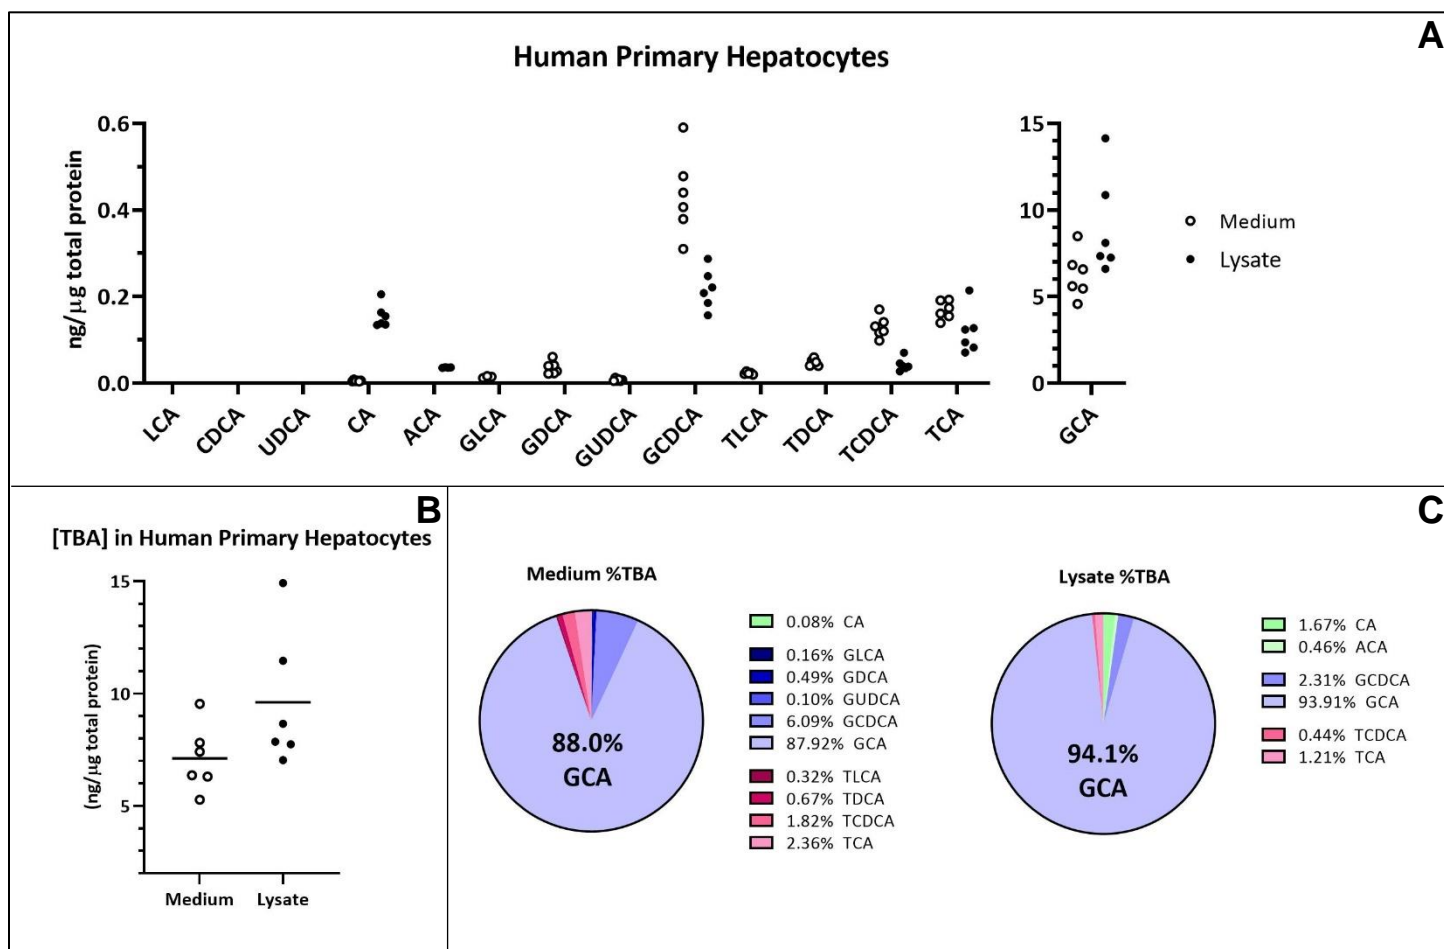

**Figure S2. Concentrations of BAs determined in human primary hepatocytes.** A: BAs measured in HPH cell media and lysates, presented as ng/ $\mu$ g total protein. B: Concentrations of TBA measured in HPH cell media and lysates, presented as ng/ $\mu$ g total protein. C: Composition of BA pool in HPHs, presented as average (n=6) percent of TBA. Unconjugated BAs are represented in shades of green, G-amidated BAs in shades of blue, and T-amidated BAs in shades of red. Constructed from data in Tables 2 and 3.

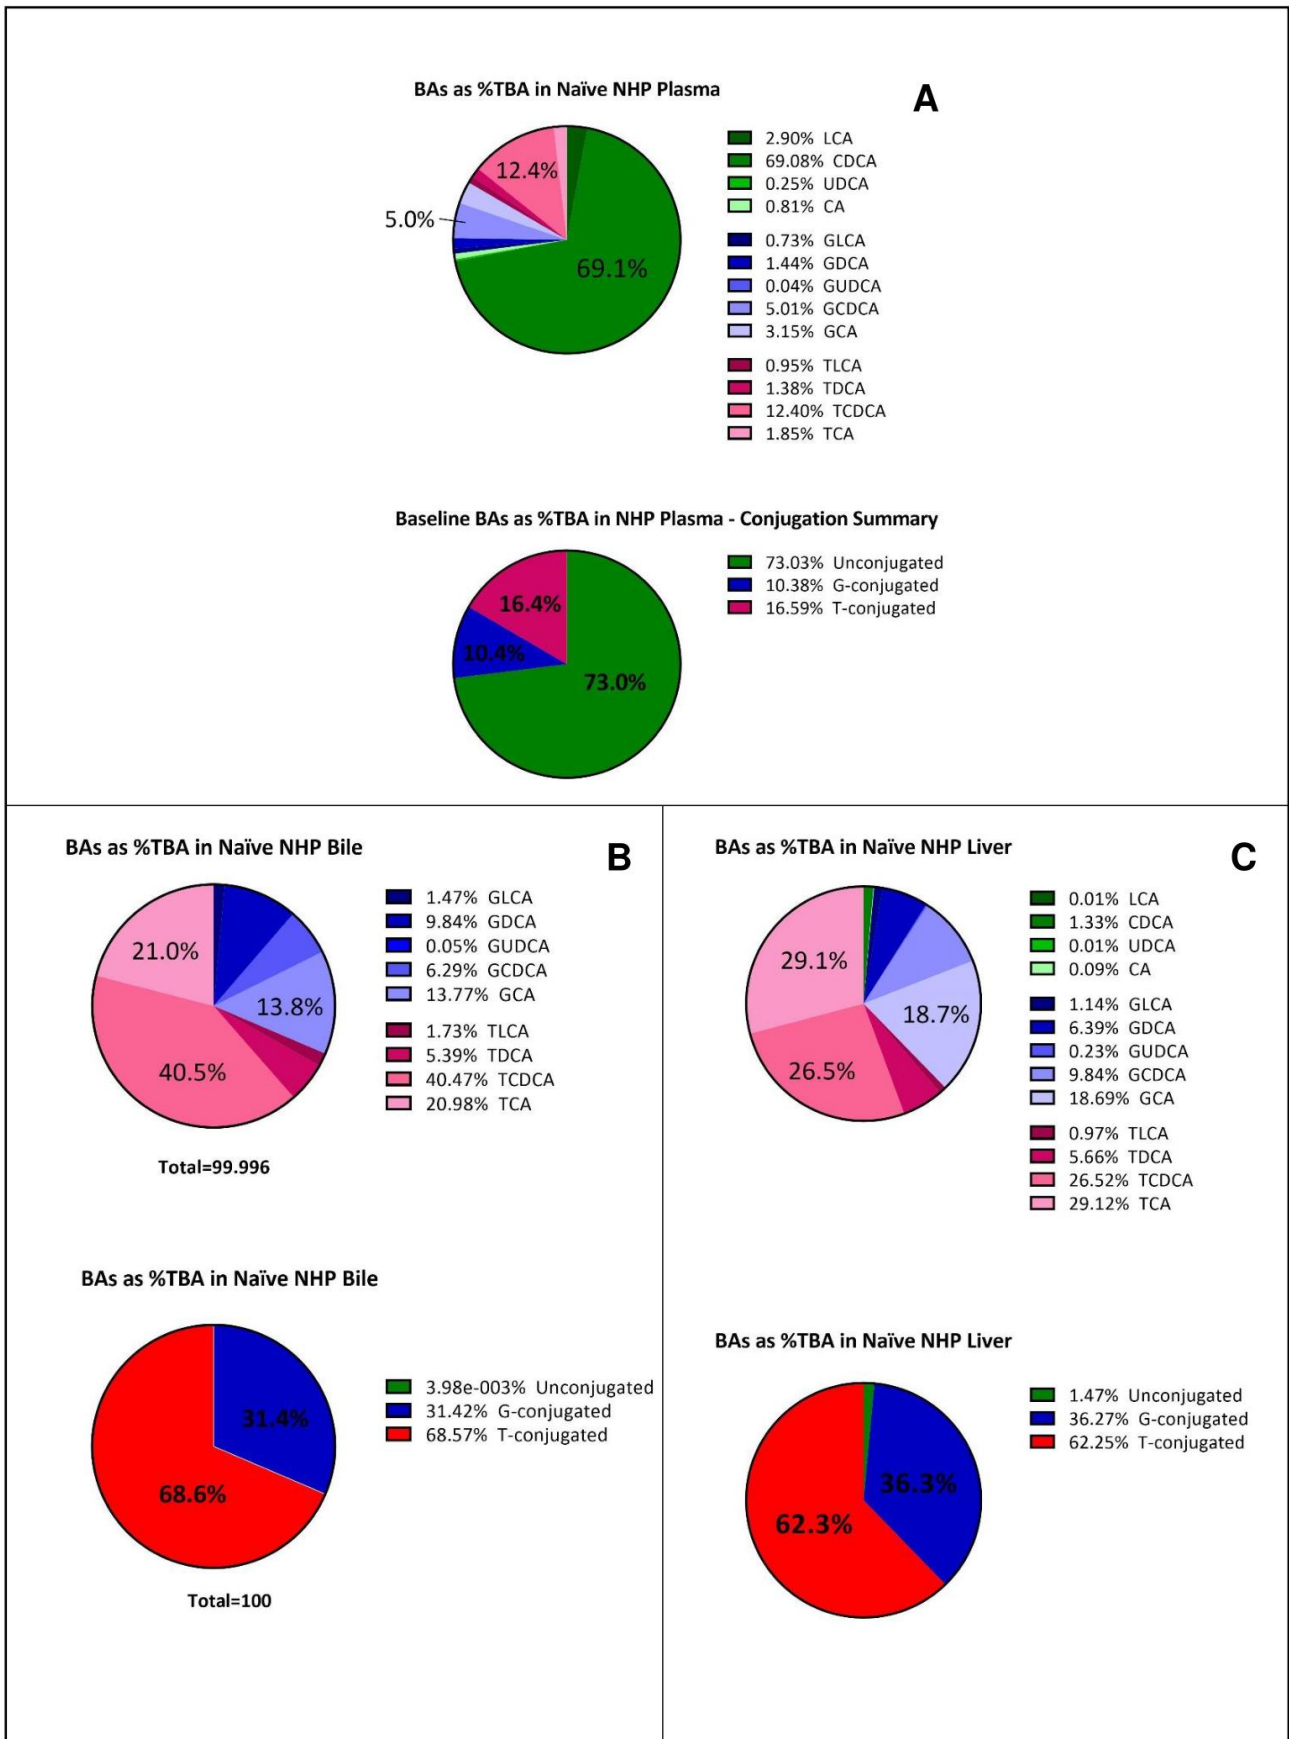

**Figure S3.** BA pools and amidation summaries in *M. mulatta* tissue and biofluids, presented as average percent TBA. A:



BA pool in plasma. B: BA pool in bile. C: BA pool in liver. The amounts of three largest portions of the BA pool are explicitly stated within the pie charts. Unconjugated BAs are represented in shades of green, G-amidated in shades of blue, and T-amidated in shades of red.
